# Supplementary material for: Eliminating disorder in a self-assembled calixarene nanotube
Source: Royal Society of Chemistry journal article supplement (doi:10.1039/c2ce26536b), 2012-11-20
Supplement: c2ce26536b.pdf [file c2ce26536b.pdf]

## Supporting Information: Eliminating disorder in a self-assembled calixarene nanotube

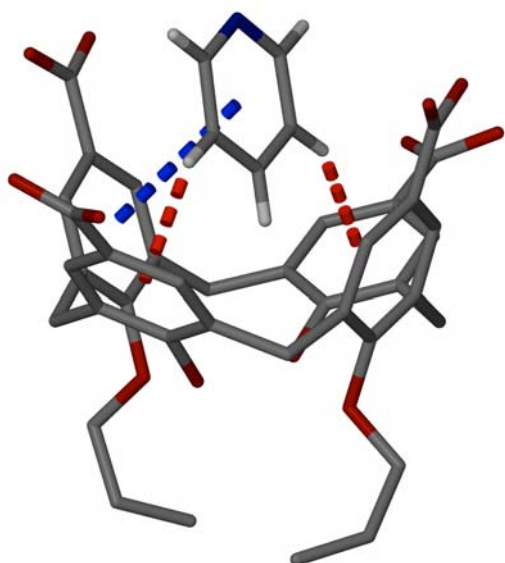

**Figure S1.** CH... $\pi$  and  $\pi$ -stacking interactions found between **8** and endo-cavity Py of crystallisation shown as dashed red and blue lines respectively.

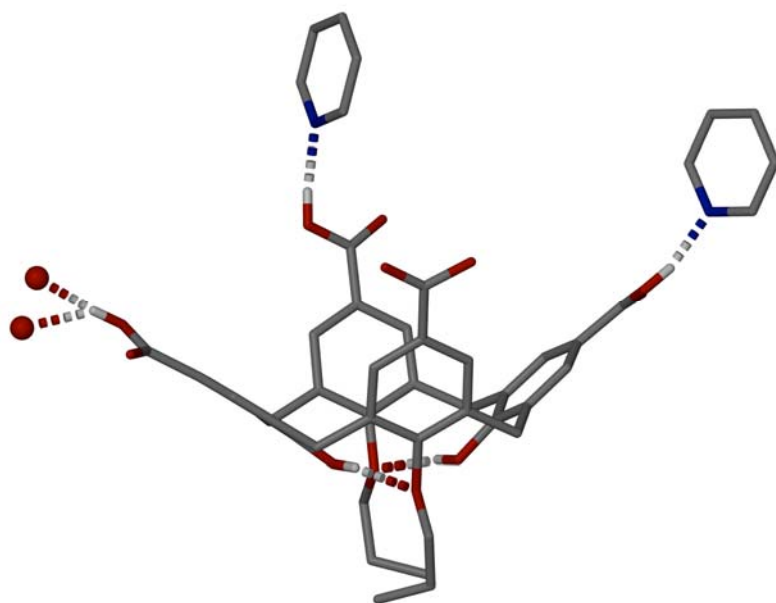

**Figure S2.** Hydrogen bonding interactions observed between crystallographically unique **8** and either Py or disordered water of crystallisation.
